# Supplementary material
Source: publisher figshare collection journal article supplement (https://frontiersin.figshare.com/ndownloader/files/22530509)
Supplement: Supplementary file [file 22530509]

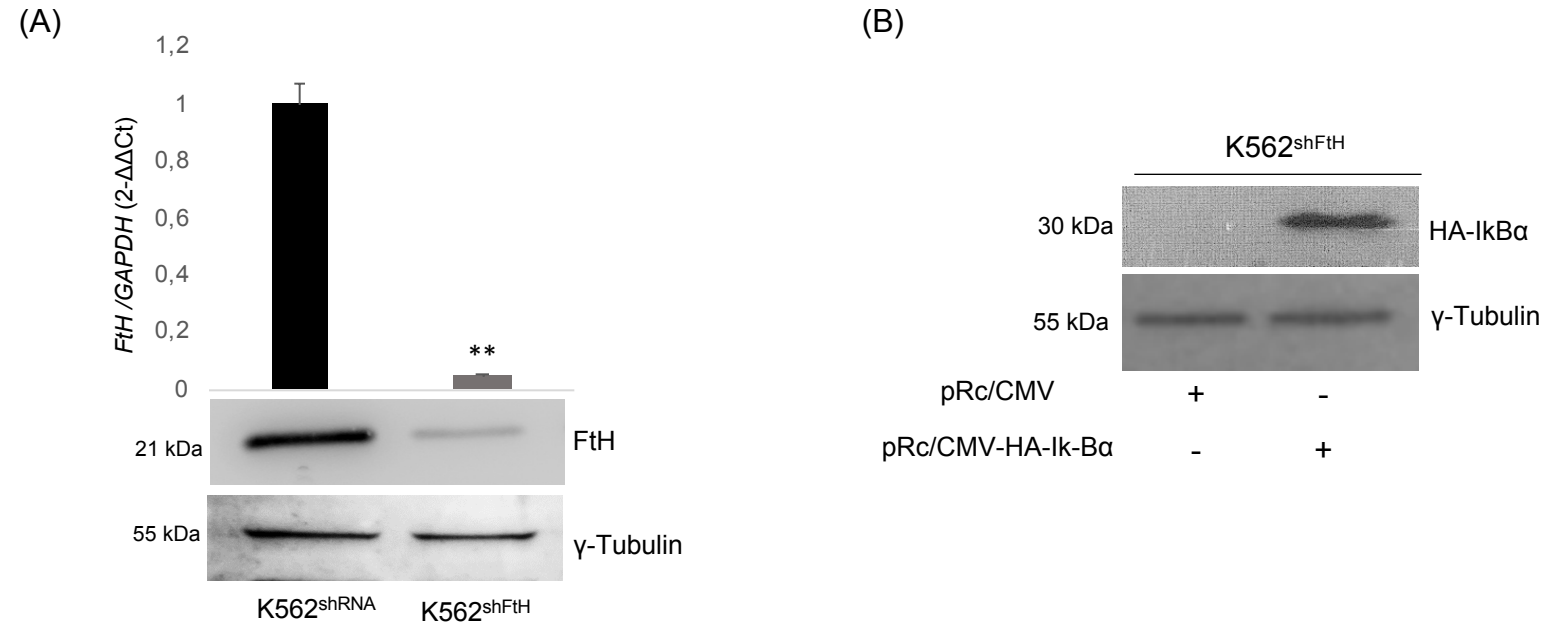

**Figure S1. (A)** *FtH* silencing. qPCR (up) and Western Blot analysis (down) of *FtH* in K562<sup>shRNA</sup> and K562<sup>shFtH</sup> cells. Final results represent mean  $\pm$  SD of three independent experiments, \*\* $p < 0.01$ .  $\gamma$ -Tubulin was used as loading control. **(B)**. Representative Western Blot analysis for HA-I $\kappa$ B $\alpha$  expression in K562<sup>shFtH</sup> cells.  $\gamma$ -Tubulin was used as loading control.
